# Supplementary material for: Enhanced catalytic activity of palladium nanoparticles confined inside porous carbon in methanol electro-oxidation
Source: Royal Society of Chemistry journal article supplement (doi:10.1039/c4gc02052a), 2014-12-05
Supplement: c4gc02052a1.pdf [file c4gc02052a1.pdf]

### **Supporting Information**

#### **Enhanced Catalytic Activity of Palladium Nanoparticles Confined inside Porous Carbon in Methanol Electro-Oxidation**

Abheek Datta, Sutanu Kapri and Sayan Bhattacharyya\*

*Department of Chemical Sciences, Indian Institute of Science Education and Research (IISER)  
Kolkata, Mohanpur - 741246, India*

\* Email for correspondence: [sayanb@iiserkol.ac.in](mailto:sayanb@iiserkol.ac.in)

## S1. X-ray Photoelectron Spectroscopy (XPS)

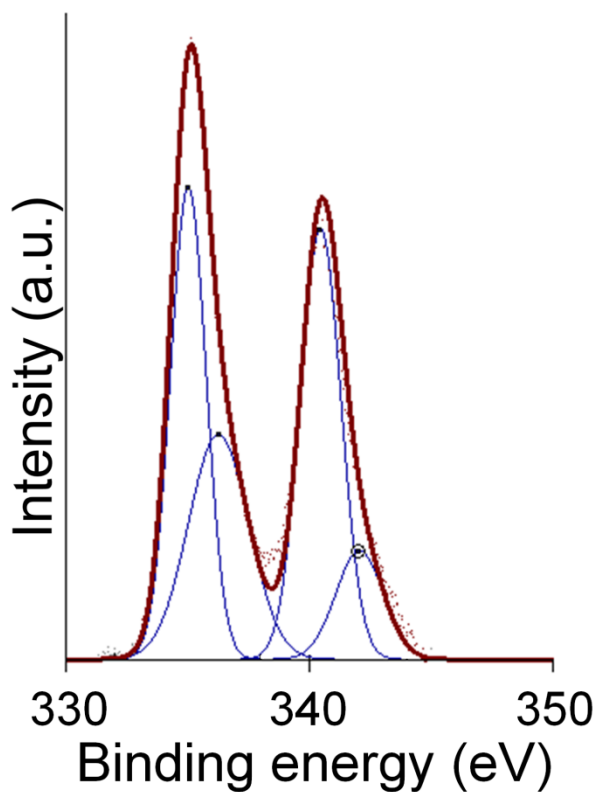

**Figure S1:** Pd *3d* XPS spectrum of Pd@C1.

XPS analysis of the Pd *3d* core level in Pd@C1 shows the presence of 35% Pd<sup>2+</sup> species. The Pd *3d* peaks are resolved into two sets of spin-orbit doublets. Pd (*3d*<sub>5/2, 3/2</sub>) peaks observed at 335.1 and 340.4 eV are due to the presence of Pd<sup>0</sup> state and the peaks at 336.2 and 342.03 eV are assigned to Pd<sup>2+</sup>.

**S2. Cyclic Voltammograms (CVs) without catalyst (blank) and only mesoporous carbon (without Pd NPs)**

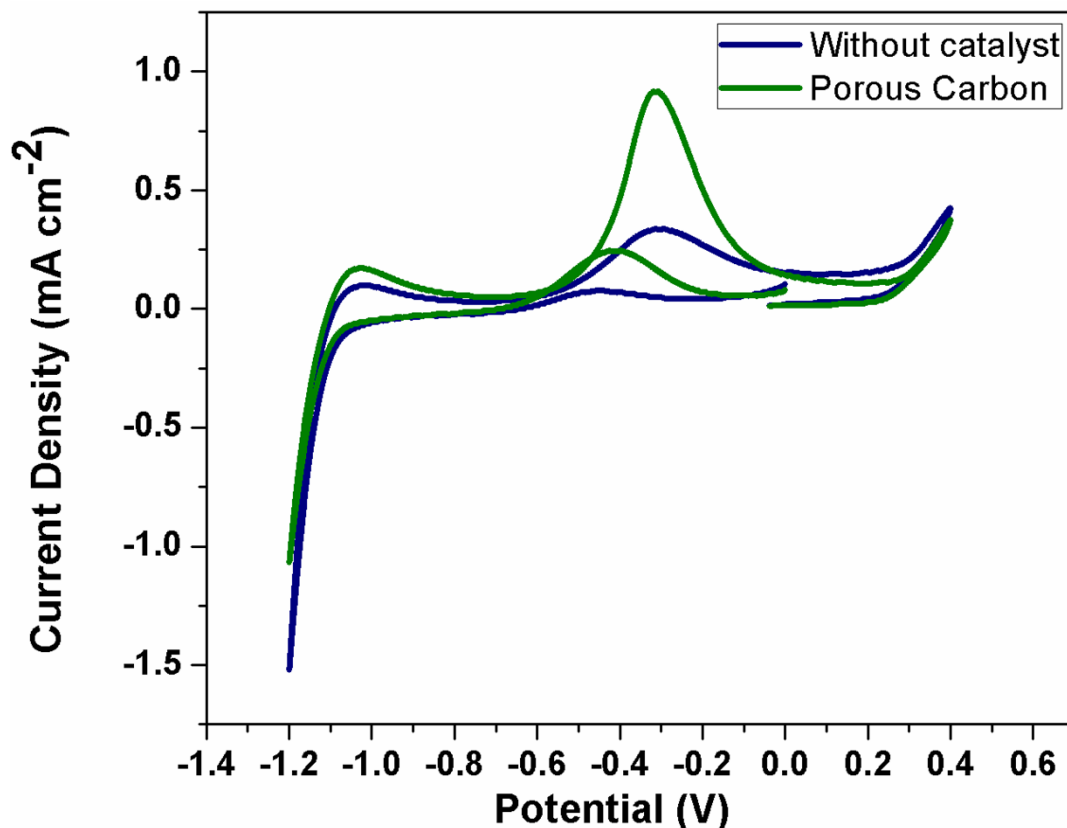

**Figure S2:** CVs for MeOH EOX without catalyst and with mesoporous carbon having no metal loading.

The blank reaction without any catalyst showed negligible peak current density (0.3 mA/cm<sup>2</sup>) with very low ECSA of 1.23 cm<sup>2</sup> at potential -0.03 V. On the other hand the electrooxidation reaction using mesoporous carbon without Pd NP loading showed a peak current density 0.9 mA/cm<sup>2</sup>. The ESCA was observed to be 1.71 cm<sup>2</sup>/mg<sub>Carbon</sub>. The catalytic activity of mesoporous carbon can result from the active defect sites, which are high in number.

**Table S3:** Recyclability of Pd@C1, Pd@C2 and Pd/C catalysts. All measurements were performed with 0.5 M MeOH and 0.5 M KOH)

| Catalyst | Cycles | Reaction Condition (Stirring) | Potential (V) | Peak Current density (mAcm <sup>-2</sup> ) | Mass-specific current density Peak (A/mg <sub>Pd</sub> ) | Electrochemically active surface area (ECSA) (cm <sup>2</sup> /mg <sub>Pd</sub> ) |
|----------|--------|-------------------------------|---------------|--------------------------------------------|----------------------------------------------------------|-----------------------------------------------------------------------------------|
| Pd@C1    | 1      | Without                       | 0.45          | 141                                        | 801                                                      | 613                                                                               |
|          |        | With                          | -0.29         | 142                                        | 815                                                      | 626                                                                               |
|          | 100    | Without                       | 0.45          | 125                                        | 722                                                      | 491                                                                               |
|          |        | With                          | -0.28         | 128                                        | 735                                                      | 516                                                                               |
|          | 200    | Without                       | 0.46          | 100                                        | 512                                                      | 386                                                                               |
|          |        | With                          | -0.33         | 100                                        | 570                                                      | 404                                                                               |
|          | 300    | Without                       | 0.49          | 12                                         | 95                                                       | 91                                                                                |
|          |        | With                          | -0.28         | 29                                         | 163                                                      | 139                                                                               |
| Pd@C2    | 1      | Without                       | 0.50          | 120                                        | 265                                                      | 191                                                                               |
|          |        | With                          | -0.30         | 100                                        | 286                                                      | 234                                                                               |
|          | 100    | Without                       | 0.49          | 91                                         | 210                                                      | 175                                                                               |
|          |        | With                          | -0.30         | 85                                         | 240                                                      | 202                                                                               |
|          | 200    | Without                       | 0.47          | 69                                         | 72                                                       | 159                                                                               |
|          |        | With                          | -0.33         | 72                                         | 200                                                      | 176                                                                               |
|          | 300    | Without                       | 0.46          | 6                                          | 12                                                       | 14                                                                                |
|          |        | With                          | -0.3          | 10                                         | 27                                                       | 22                                                                                |
| Pd/C     | 1      | Without                       | 0.56          | 108                                        | 185                                                      | 189                                                                               |
|          |        | With                          | -0.25         | 70                                         | 121                                                      | 162                                                                               |
|          | 100    | Without                       | 0.53          | 13                                         | 79                                                       | 46                                                                                |
|          |        | With                          | -0.27         | 41                                         | 110                                                      | 95                                                                                |
|          | 200    | Without                       | --            | --                                         | 4                                                        | 5.2                                                                               |
|          |        | With                          | -0.30         | 3                                          | 9                                                        | 7.6                                                                               |
|          | 300    | Without                       | --            | --                                         | 1                                                        | 1.3                                                                               |
|          |        | With                          | -0.3          | 1                                          | 2                                                        | 2.2                                                                               |

**Table S4:** Effect of alkali concentration on methanol electro-oxidation. All measurements were performed with 0.5 M MeOH using Pd@C1 catalyst.

| Concentration of KOH (M) | Reaction Condition (Stirring) | Potential (V) | Peak Current density ( $\text{mAcm}^{-2}$ ) | Mass-specific Current density Peak ( $\text{A/mg}_{\text{Pd}}$ ) | Electrochemically active surface area (ECSA) ( $\text{cm}^2/\text{mg}_{\text{Pd}}$ ) |
|--------------------------|-------------------------------|---------------|---------------------------------------------|------------------------------------------------------------------|--------------------------------------------------------------------------------------|
| 0.1                      | Without                       | 0.45          | 80                                          | 425                                                              | 322                                                                                  |
|                          | With                          | -0.3          | 70                                          | 412                                                              | 297                                                                                  |
| 0.2                      | Without                       | 0.47          | 101                                         | 560                                                              | 401                                                                                  |
|                          | With                          | -0.3          | 97                                          | 543                                                              | 472                                                                                  |
| 0.5                      | Without                       | 0.45          | 141                                         | 801                                                              | 613                                                                                  |
|                          | With                          | -0.29         | 142                                         | 815                                                              | 626                                                                                  |
| 1.0                      | Without                       | 0.45          | 139                                         | 780                                                              | 589                                                                                  |
|                          | With                          | -0.29         | 135                                         | 785                                                              | 607                                                                                  |

**Table S5:** Effect of methanol concentration on its electro-oxidation. All measurements were performed with 0.5 M KOH using Pd@C1 catalyst.

| Concentration of MeOH (M) | Reaction Condition (Stirring) | Potential (V) | Peak Current density ( $\text{mAcm}^{-2}$ ) | Mass-specific Current density Peak ( $\text{A/mg}_{\text{Pd}}$ ) | Electrochemically active surface area (ECSA) ( $\text{cm}^2/\text{mg}_{\text{Pd}}$ ) |
|---------------------------|-------------------------------|---------------|---------------------------------------------|------------------------------------------------------------------|--------------------------------------------------------------------------------------|
| 0.1                       | Without                       | 0.5           | 103                                         | 465                                                              | 378                                                                                  |
|                           | With                          | -0.3          | 76                                          | 426                                                              | 357                                                                                  |
| 0.2                       | Without                       | 0.49          | 122                                         | 556                                                              | 462                                                                                  |
|                           | With                          | -0.3          | 92                                          | 517                                                              | 437                                                                                  |
| 0.5                       | Without                       | 0.45          | 141                                         | 801                                                              | 613                                                                                  |
|                           | With                          | -0.29         | 142                                         | 815                                                              | 626                                                                                  |
| 1.0                       | Without                       | 0.45          | 133                                         | 726                                                              | 603                                                                                  |
|                           | With                          | -0.28         | 120                                         | 700                                                              | 591                                                                                  |
